# Supplementary material
Source: PubMed Central journal article supplement (PMC3711319)
Supplement: supp_M112.443416_jbc.M112.443416-1.pdf [file supp_M112.443416_jbc.M112.443416-1.pdf]

# Supplemental Material

## Figure 1

### A

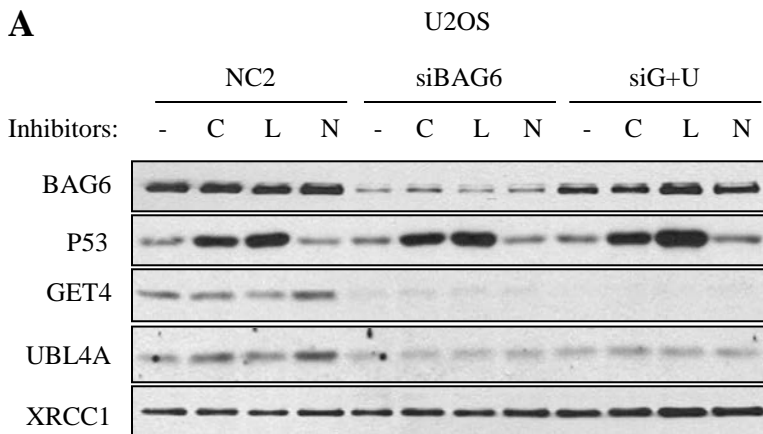

- - no inhibitor

C - chloroquine (lysosomal inhibitor), 200  $\mu$ M

L - lactacystin (proteosomal inhibitor), 20  $\mu$ M

N - NH<sub>4</sub>Cl (lysosomal inhibitor), 20 mM

### B

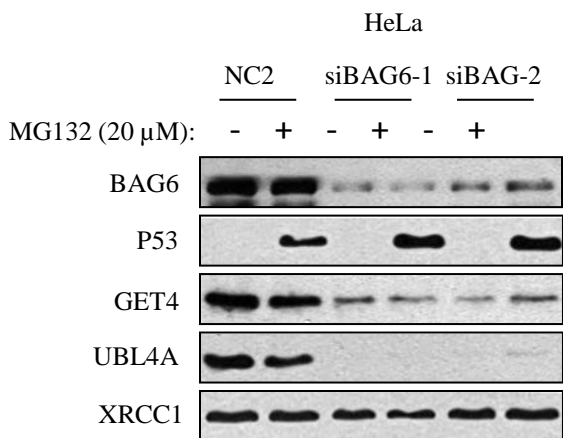

Supplemental Figure 1. **GET4 and UBL4A can not be stabilized upon proteasome and lysosome treatment in the absence of BAG6.** U2OS (A) and HeLa (B) were treated with indicated inhibitors at indicated final concentrations for 6 hrs. Cells were harvested and protein distributions were assessed by Western blotting using indicated antibodies .

**Supplemental Material**

**Figure 2**

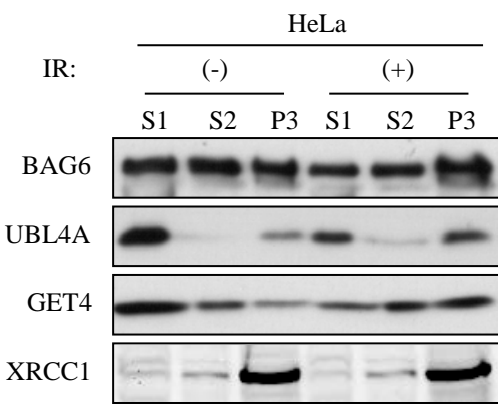

Supplemental Figure 2. **UBL4A and GET4 translocate to nucleus upon DNA damage.** Chromatin fractionations were performed on untreated or IR-treated HeLa cells. Protein distributions were assessed by Western blotting using indicated antibodies. S1 fraction – cytoplasm, S2 – soluble nucleus fraction and P3 – chromatin bound fraction.

Figure 3

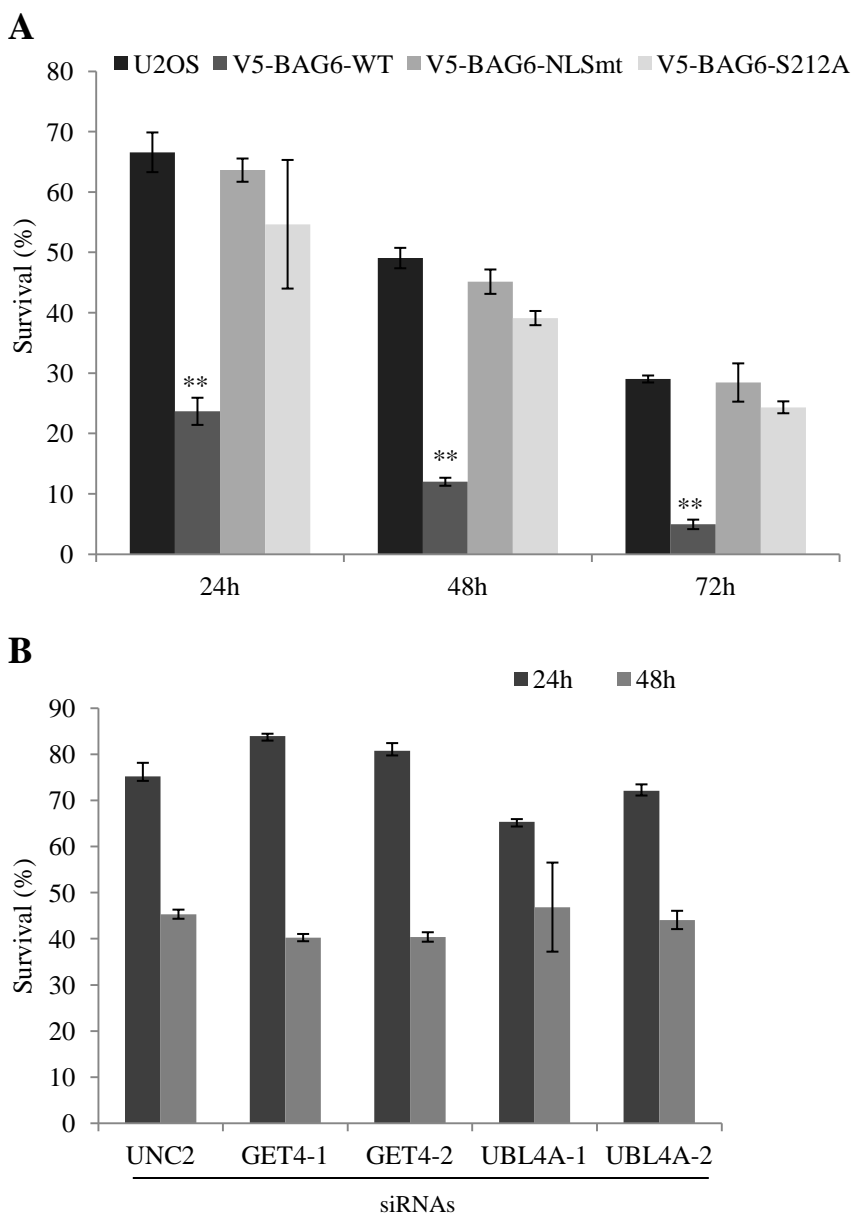

Supplemental Figure 3. **Cells are not resistant to DNA damage induced cell death in the absence of GET4 or UBL4A.** A, U2OS cells and U2OS cells stably expressing the indicated proteins were treated with doxorubicin (2  $\mu$ g/ml). Cell survival was determined using WST-1 assays at 24, 48 or 72 hours post treatment. B, U2OS cells transfected with indicated siRNAs were treated with doxorubicin (2  $\mu$ g/ml). Cell survival was determined as described in (A). All error bars represent mean  $\pm$  SD (n=3). \*\* - p<0.01.

Figure 4

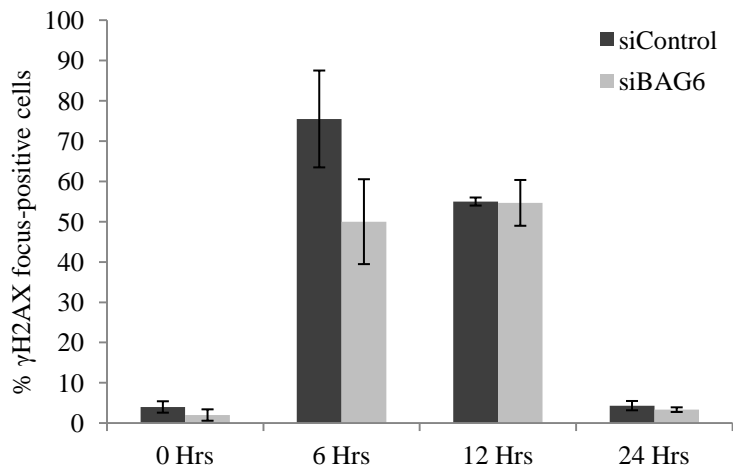

Supplemental Figure 4. **BAG6 complex does not affect DNA damage-induced  $\gamma$ H2AX foci formation in U2OS cells depleted of BAG6 complex.** Quantitative determination of cells forming  $\gamma$ H2AX foci upon DNA damage. U2OS cells were transfected with BAG6 siRNA and treated with 10 Gy IR. Cells were fixed at indicated times after IR and stained with  $\gamma$ H2AX antibody and subjected to quantification. At least 300 cells were counted to determine the percentage of foci-containing cells. Data are represented as mean  $\pm$  SD (n=3).

Figure 5

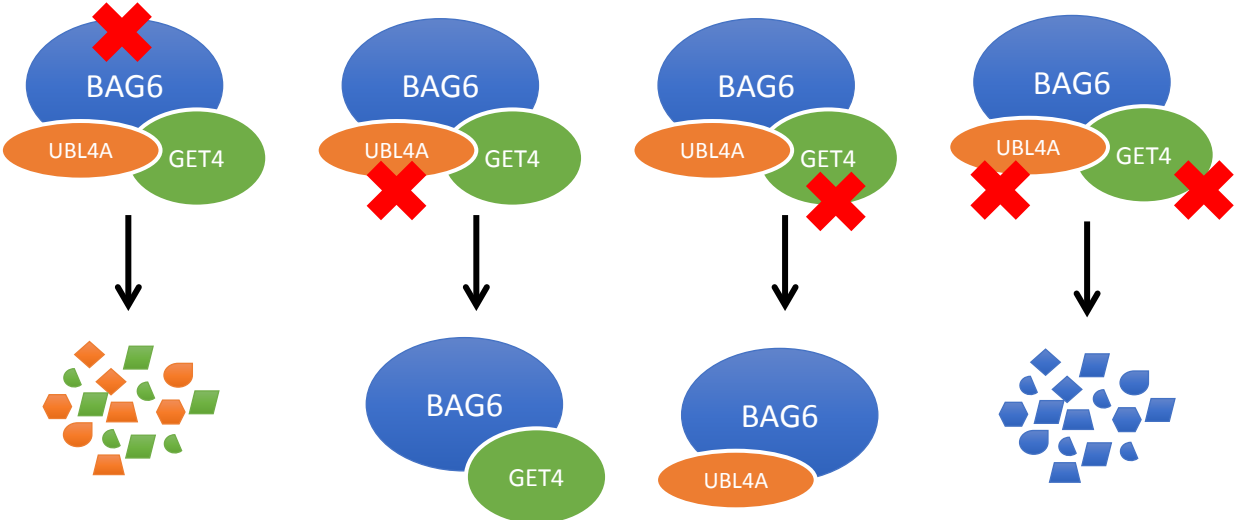

Supplemental Figure 5. **BAG6 complex stability.** BAG6 complex exists as either a stable ternary complex composed of BAG6, UBL4A and GET4, or binary complex composed of BAG6/UBL4A or BAG6/GET4. In the absence of BAG6, GET4 and UBL4A levels are reduced; in the absence of both GET4 and UBL4A, BAG6 level is reduced. The mechanism that regulate the protein levels is yet to be identified.
